# Supplementary material for: Microevolution of Serial Clinical Isolates of Cryptococcus neoformans var. grubii and C. gattii
Source: PubMed Central journal article supplement (PMC5340869; doi:10.1128/mbio.00166-17), 2017-03-07
Supplement: mbo001173217st4.pdf [file mbo001173217st4.pdf]

|                      | POS    | REF<br>(R265) | ALT | case<br>31 | case<br>67 | Annotation                                                                                                                                                                            | Protein change |
|----------------------|--------|---------------|-----|------------|------------|---------------------------------------------------------------------------------------------------------------------------------------------------------------------------------------|----------------|
| <b>supercont2.5</b>  | 176915 | T             | C   | 0-1        | -          | CDS,I308_02136,TCO1                                                                                                                                                                   | Met -> Val     |
| <b>supercont2.5</b>  | 177510 | T             | A   | 1-0        | -          | CDS,I308_02136,TCO1                                                                                                                                                                   | Lys -> Val     |
| <b>supercont2.7</b>  | 706023 | G             | A   | 0-1        | -          | CDS,I308_03093,tRNA-dihydrouridine synthase 1                                                                                                                                         |                |
| <b>supercont2.14</b> | 85503  | T             | G   | -          | 0-1        | intergenic -- prev_gene(81757-84337)[<-(1166)]:<br>I308_04861 inositol/phosphatidylinositol phosphatase (+) --<br>next_gene(85769-88804)[(266)-->]: I308_04862 glucose<br>oxidase (+) |                |
| <b>supercont2.27</b> | 61569  | A             | G   | 0-1        | -          | intron,I308_06655,D-3-phosphoglycerate dehydrogenase                                                                                                                                  |                |
