# Supplementary material for: Microevolution of Serial Clinical Isolates of Cryptococcus neoformans var. grubii and C. gattii
Source: PubMed Central journal article supplement (PMC5340869; doi:10.1128/mbio.00166-17), 2017-03-07
Supplement: mbo001173217st5.pdf [file mbo001173217st5.pdf]

| Strain      | Exp ID | Day 1 |    |   | Day 2 |    |   | Day 3 |    |   | Day 4 |    |   | Day 5 |    |   | Day 6 |    |   | Day 7 |    |   | Day 8 |    |   | Day 9 |    |   | Day 10 |   |   |
|-------------|--------|-------|----|---|-------|----|---|-------|----|---|-------|----|---|-------|----|---|-------|----|---|-------|----|---|-------|----|---|-------|----|---|--------|---|---|
|             |        | D     | A  | C | D     | A  | C | D     | A  | C | D     | A  | C | D     | A  | C | D     | A  | C | D     | A  | C | D     | A  | C | D     | A  | C | D      | A | C |
| PBS         | 1      | 0     | 15 | 0 | 0     | 15 | 0 | 0     | 15 | 0 | 1     | 14 | 0 | 0     | 14 | 0 | 0     | 14 | 0 | 1     | 11 | 2 | 0     | 7  | 4 | 1     | 6  | 0 | 0      | 4 | 2 |
|             | 2      | 0     | 15 | 0 | 0     | 15 | 0 | 1     | 14 | 0 | 0     | 14 | 0 | 0     | 14 | 0 | 0     | 14 | 0 | 0     | 10 | 4 | 0     | 8  | 2 | 0     | 7  | 1 | 0      | 2 | 5 |
|             | 3      | 0     | 15 | 0 | 0     | 15 | 0 | 0     | 15 | 0 | 0     | 15 | 0 | 0     | 15 | 0 | 0     | 15 | 0 | 1     | 14 | 0 | 1     | 10 | 3 | 0     | 10 | 0 | 0      | 7 | 3 |
|             | 4      | 0     | 15 | 0 | 0     | 15 | 0 | 0     | 15 | 0 | 0     | 15 | 0 | 0     | 14 | 1 | 1     | 13 | 0 | 1     | 11 | 1 | 0     | 9  | 2 | 1     | 6  | 2 | 0      | 5 | 1 |
|             | 5      | 0     | 15 | 0 | 0     | 15 | 0 | 0     | 15 | 0 | 0     | 15 | 0 | 0     | 15 | 0 | 0     | 14 | 1 | 0     | 12 | 2 | 0     | 10 | 2 | 0     | 8  | 2 | 1      | 7 | 0 |
|             | 6      | 0     | 15 | 0 | 0     | 15 | 0 | 0     | 15 | 0 | 0     | 15 | 0 | 0     | 15 | 0 | 0     | 15 | 0 | 0     | 14 | 1 | 5     | 8  | 1 | 0     | 5  | 3 | 2      | 3 | 0 |
|             | 7      | 0     | 15 | 0 | 0     | 15 | 0 | 0     | 15 | 0 | 0     | 15 | 0 | 0     | 5  | 0 | 0     | 14 | 1 | 1     | 11 | 2 | 0     | 8  | 3 | 1     | 6  | 1 | 0      | 5 | 1 |
|             | 8      | 0     | 15 | 0 | 1     | 14 | 0 | 0     | 14 | 0 | 0     | 14 | 0 | 2     | 12 | 0 | 1     | 10 | 1 | 1     | 9  | 0 | 1     | 8  | 0 | 1     | 6  | 1 | 0      | 6 | 0 |
|             | 9      | 0     | 15 | 0 | 0     | 15 | 0 | 0     | 15 | 0 | 0     | 15 | 0 | 0     | 15 | 0 | 0     | 15 | 0 | 0     | 15 | 0 | 0     | 11 | 4 | 1     | 9  | 1 | 0      | 6 | 3 |
| H99         | 1      | 0     | 15 | 0 | 0     | 15 | 0 | 0     | 15 | 0 | 11    | 4  | 0 | 4     | 0  | 0 | 0     | 0  | 0 | 0     | 0  | 0 | 0     | 0  | 0 | 0     | 0  | 0 | 0      | 0 | 0 |
|             | 2      | 1     | 15 | 0 | 0     | 15 | 0 | 4     | 11 | 0 | 8     | 3  | 0 | 3     | 0  | 0 | 0     | 0  | 0 | 0     | 0  | 0 | 0     | 0  | 0 | 0     | 0  | 0 | 0      | 0 | 0 |
|             | 3      | 0     | 15 | 0 | 0     | 15 | 0 | 3     | 12 | 0 | 11    | 1  | 0 | 0     | 1  | 0 | 1     | 0  | 0 | 0     | 0  | 0 | 0     | 0  | 0 | 0     | 0  | 0 | 0      | 0 | 0 |
|             | 4      | 0     | 15 | 0 | 0     | 15 | 0 | 1     | 14 | 0 | 4     | 10 | 0 | 9     | 1  | 0 | 0     | 1  | 0 | 1     | 0  | 0 | 0     | 0  | 0 | 0     | 0  | 0 | 0      | 0 | 0 |
|             | 5      | 0     | 15 | 0 | 0     | 15 | 0 | 1     | 14 | 0 | 8     | 6  | 0 | 6     | 0  | 0 | 0     | 0  | 0 | 0     | 0  | 0 | 0     | 0  | 0 | 0     | 0  | 0 | 0      | 0 | 0 |
|             | 6      | 0     | 15 | 0 | 0     | 15 | 0 | 1     | 14 | 0 | 5     | 9  | 0 | 9     | 0  | 0 | 0     | 0  | 0 | 0     | 0  | 0 | 0     | 0  | 0 | 0     | 0  | 0 | 0      | 0 | 0 |
|             | 7      | 0     | 15 | 0 | 0     | 15 | 0 | 0     | 15 | 0 | 9     | 6  | 0 | 4     | 2  | 0 | 2     | 0  | 0 | 0     | 0  | 0 | 0     | 0  | 0 | 0     | 0  | 0 | 0      | 0 | 0 |
|             | 8      | 0     | 15 | 0 | 0     | 15 | 0 | 0     | 15 | 0 | 3     | 12 | 0 | 11    | 1  | 0 | 1     | 0  | 0 | 0     | 0  | 0 | 0     | 0  | 0 | 0     | 0  | 0 | 0      | 0 | 0 |
|             | 9      | 0     | 15 | 0 | 0     | 15 | 0 | 0     | 15 | 0 | 11    | 4  | 0 | 4     | 0  | 0 | 0     | 0  | 0 | 0     | 0  | 0 | 0     | 0  | 0 | 0     | 0  | 0 | 0      | 0 | 0 |
| RSA-MW-36   | 2      | 0     | 15 | 0 | 0     | 15 | 0 | 0     | 15 | 0 | 0     | 15 | 0 | 0     | 15 | 0 | 0     | 15 | 0 | 10    | 4  | 1 | 3     | 1  | 0 | 1     | 0  | 0 | 0      | 0 | 0 |
|             | 4      | 0     | 15 | 0 | 0     | 15 | 0 | 0     | 15 | 0 | 0     | 15 | 0 | 0     | 15 | 0 | 2     | 13 | 0 | 3     | 10 | 0 | 7     | 3  | 0 | 1     | 2  | 0 | 2      | 0 | 0 |
|             | 5      | 0     | 15 | 0 | 0     | 15 | 0 | 0     | 15 | 0 | 0     | 15 | 0 | 0     | 15 | 0 | 0     | 15 | 0 | 2     | 13 | 0 | 5     | 8  | 0 | 6     | 2  | 0 | 2      | 0 | 0 |
| RSA-MW-3335 | 2      | 0     | 15 | 0 | 0     | 15 | 0 | 3     | 12 | 0 | 10    | 2  | 0 | 2     | 0  | 0 | 0     | 0  | 0 | 0     | 0  | 0 | 0     | 0  | 0 | 0     | 0  | 0 | 0      | 0 | 0 |
|             | 4      | 0     | 15 | 0 | 0     | 15 | 0 | 1     | 14 | 0 | 9     | 5  | 0 | 4     | 1  | 0 | 1     | 0  | 0 | 0     | 0  | 0 | 0     | 0  | 0 | 0     | 0  | 0 | 0      | 0 | 0 |
|             | 5      | 0     | 15 | 0 | 0     | 15 | 0 | 0     | 15 | 0 | 0     | 15 | 0 | 0     | 15 | 0 | 14    | 1  | 0 | 1     | 0  | 0 | 0     | 0  | 0 | 0     | 0  | 0 | 0      | 0 | 0 |
| RSA-MW-1052 | 1      | 0     | 15 | 0 | 0     | 15 | 0 | 0     | 15 | 0 | 0     | 15 | 0 | 1     | 14 | 0 | 0     | 14 | 0 | 0     | 14 | 0 | 6     | 8  | 0 | 3     | 5  | 0 | 1      | 4 | 0 |
|             | 4      | 0     | 15 | 0 | 0     | 15 | 0 | 1     | 14 | 0 | 0     | 14 | 0 | 0     | 14 | 0 | 0     | 14 | 0 | 1     | 12 | 1 | 6     | 6  | 0 | 1     | 5  | 0 | 4      | 1 | 0 |
|             | 5      | 0     | 15 | 0 | 0     | 15 | 0 | 0     | 15 | 0 | 0     | 15 | 0 | 0     | 15 | 0 | 0     | 15 | 0 | 1     | 13 | 1 | 5     | 7  | 1 | 6     | 1  | 0 | 1      | 0 | 0 |
| RSA-MW-3156 | 2      | 1     | 15 | 0 | 0     | 15 | 0 | 0     | 15 | 0 | 0     | 15 | 0 | 0     | 15 | 0 | 9     | 6  | 0 | 5     | 1  | 0 | 1     | 0  | 0 | 0     | 0  | 0 | 0      | 0 | 0 |
|             | 3      | 0     | 15 | 0 | 0     | 15 | 0 | 0     | 15 | 0 | 0     | 15 | 0 | 0     | 15 | 0 | 3     | 12 | 0 | 5     | 7  | 0 | 4     | 3  | 0 | 2     | 1  | 0 | 0      | 1 | 0 |





|             |   |   |    |   |   |    |   |   |    |   |   |    |   |    |    |   |    |    |   |   |    |   |   |    |   |   |    |   |   |   |   |
|-------------|---|---|----|---|---|----|---|---|----|---|---|----|---|----|----|---|----|----|---|---|----|---|---|----|---|---|----|---|---|---|---|
|             | 5 | 0 | 15 | 0 | 0 | 15 | 0 | 0 | 15 | 0 | 0 | 15 | 0 | 2  | 13 | 0 | 0  | 13 | 0 | 2 | 11 | 0 | 3 | 8  | 0 | 4 | 4  | 0 | 4 | 0 | 0 |
| RSA-MW-2163 | 1 | 1 | 15 | 0 | 0 | 15 | 0 | 0 | 15 | 0 | 8 | 7  | 0 | 3  | 4  | 0 | 4  | 0  | 0 | 0 | 0  | 0 | 0 | 0  | 0 | 0 | 0  | 0 | 0 | 0 | 0 |
|             | 3 | 0 | 15 | 0 | 0 | 15 | 0 | 0 | 15 | 0 | 7 | 8  | 0 | 4  | 4  | 0 | 4  | 0  | 0 | 0 | 0  | 0 | 0 | 0  | 0 | 0 | 0  | 0 | 0 | 0 | 0 |
|             | 5 | 0 | 15 | 0 | 0 | 15 | 0 | 0 | 15 | 0 | 3 | 12 | 0 | 0  | 0  | 0 | 12 | 0  | 0 | 0 | 0  | 0 | 0 | 0  | 0 | 0 | 0  | 0 | 0 | 0 | 0 |
| RSA-MW-3747 | 2 | 1 | 15 | 0 | 0 | 15 | 0 | 0 | 15 | 0 | 6 | 9  | 0 | 8  | 1  | 0 | 1  | 0  | 0 | 0 | 0  | 0 | 0 | 0  | 0 | 0 | 0  | 0 | 0 | 0 | 0 |
|             | 3 | 0 | 15 | 0 | 0 | 15 | 0 | 1 | 14 | 0 | 7 | 7  | 0 | 7  | 0  | 0 | 0  | 0  | 0 | 0 | 0  | 0 | 0 | 0  | 0 | 0 | 0  | 0 | 0 | 0 | 0 |
|             | 5 | 0 | 15 | 0 | 0 | 15 | 0 | 0 | 15 | 0 | 9 | 6  | 0 | 5  | 1  | 0 | 0  | 1  | 0 | 1 | 0  | 0 | 0 | 0  | 0 | 0 | 0  | 0 | 0 | 0 | 0 |
| RSA-MW-2015 | 2 | 1 | 15 | 0 | 0 | 15 | 0 | 0 | 15 | 0 | 0 | 15 | 0 | 4  | 11 | 0 | 11 | 0  | 0 | 0 | 0  | 0 | 0 | 0  | 0 | 0 | 0  | 0 | 0 | 0 | 0 |
|             | 4 | 0 | 15 | 0 | 0 | 15 | 0 | 0 | 15 | 0 | 0 | 15 | 0 | 7  | 8  | 0 | 7  | 1  | 0 | 1 | 0  | 0 | 0 | 0  | 0 | 0 | 0  | 0 | 0 | 0 | 0 |
|             | 5 | 0 | 15 | 0 | 0 | 15 | 0 | 0 | 15 | 0 | 0 | 15 | 0 | 9  | 6  | 0 | 4  | 2  | 0 | 2 | 0  | 0 | 0 | 0  | 0 | 0 | 0  | 0 | 0 | 0 | 0 |
| RSA-MW-3474 | 1 | 0 | 15 | 0 | 0 | 15 | 0 | 0 | 15 | 0 | 0 | 15 | 0 | 14 | 1  | 0 | 0  | 1  | 0 | 1 | 0  | 0 | 0 | 0  | 0 | 0 | 0  | 0 | 0 | 0 | 0 |
|             | 3 | 0 | 15 | 0 | 0 | 15 | 0 | 0 | 15 | 0 | 4 | 11 | 0 | 5  | 6  | 0 | 5  | 1  | 0 | 1 | 0  | 0 | 0 | 0  | 0 | 0 | 0  | 0 | 0 | 0 | 0 |
|             | 5 | 0 | 15 | 0 | 0 | 15 | 0 | 0 | 15 | 0 | 4 | 11 | 0 | 11 | 0  | 0 | 0  | 0  | 0 | 0 | 0  | 0 | 0 | 0  | 0 | 0 | 0  | 0 | 0 | 0 | 0 |
| RSA-MW-2364 | 2 | 1 | 15 | 0 | 0 | 15 | 0 | 0 | 15 | 0 | 0 | 15 | 0 | 0  | 15 | 0 | 7  | 8  | 0 | 5 | 3  | 0 | 2 | 1  | 0 | 1 | 0  | 0 | 0 | 0 | 0 |
|             | 3 | 0 | 15 | 0 | 1 | 14 | 0 | 0 | 14 | 0 | 0 | 14 | 0 | 1  | 13 | 0 | 2  | 11 | 0 | 6 | 5  | 0 | 2 | 3  | 0 | 2 | 1  | 0 | 0 | 1 | 0 |
|             | 6 | 0 | 15 | 0 | 0 | 15 | 0 | 0 | 15 | 0 | 0 | 15 | 0 | 0  | 15 | 0 | 0  | 15 | 0 | 3 | 12 | 0 | 7 | 5  | 0 | 1 | 4  | 0 | 2 | 2 | 0 |
| RSA-MW-3580 | 2 | 1 | 15 | 0 | 0 | 15 | 0 | 0 | 15 | 0 | 0 | 15 | 0 | 0  | 15 | 0 | 6  | 9  | 0 | 7 | 1  | 1 | 1 | 0  | 0 | 0 | 0  | 0 | 0 | 0 | 0 |
|             | 3 | 0 | 15 | 0 | 0 | 15 | 0 | 0 | 15 | 0 | 0 | 15 | 0 | 0  | 15 | 0 | 3  | 12 | 0 | 5 | 7  | 0 | 5 | 2  | 0 | 1 | 1  | 0 | 1 | 0 | 0 |
|             | 6 | 0 | 15 | 0 | 0 | 15 | 0 | 0 | 15 | 0 | 0 | 15 | 0 | 0  | 15 | 0 | 1  | 14 | 0 | 7 | 7  | 0 | 5 | 2  | 0 | 1 | 1  | 0 | 1 | 0 | 0 |
| RSA-MW-500  | 7 | 0 | 15 | 0 | 0 | 15 | 0 | 0 | 15 | 0 | 0 | 15 | 0 | 0  | 15 | 0 | 1  | 14 | 0 | 2 | 12 | 0 | 3 | 8  | 1 | 2 | 6  | 0 | 4 | 2 | 0 |
|             | 8 | 0 | 15 | 0 | 0 | 15 | 0 | 1 | 14 | 0 | 0 | 14 | 0 | 0  | 14 | 0 | 0  | 14 | 0 | 4 | 10 | 0 | 2 | 8  | 0 | 2 | 6  | 0 | 2 | 4 | 0 |
|             | 9 | 0 | 15 | 0 | 1 | 14 | 0 | 0 | 14 | 0 | 1 | 13 | 0 | 0  | 13 | 0 | 0  | 13 | 0 | 1 | 12 | 0 | 2 | 10 | 0 | 4 | 6  | 0 | 4 | 2 | 0 |
| RSA-MW-2343 | 7 | 0 | 15 | 0 | 0 | 15 | 0 | 0 | 15 | 0 | 0 | 15 | 0 | 0  | 15 | 0 | 1  | 13 | 1 | 0 | 12 | 1 | 0 | 12 | 0 | 0 | 12 | 0 | 4 | 8 | 0 |
|             | 8 | 0 | 15 | 0 | 0 | 15 | 0 | 0 | 15 | 0 | 1 | 14 | 0 | 0  | 14 | 0 | 4  | 9  | 1 | 0 | 9  | 0 | 1 | 8  | 0 | 3 | 5  | 0 | 1 | 4 | 0 |
|             | 9 | 0 | 15 | 0 | 1 | 14 | 0 | 0 | 14 | 0 | 1 | 13 | 0 | 0  | 13 | 0 | 2  | 11 | 0 | 0 | 11 | 0 | 0 | 11 | 0 | 1 | 10 | 0 | 4 | 6 | 0 |
| RSA-MW-3980 | 7 | 0 | 15 | 0 | 0 | 15 | 0 | 0 | 15 | 0 | 0 | 15 | 0 | 2  | 13 | 0 | 0  | 13 | 0 | 4 | 9  | 0 | 0 | 9  | 0 | 0 | 9  | 0 | 4 | 5 | 0 |
|             | 8 | 0 | 15 | 0 | 1 | 14 | 0 | 0 | 14 | 0 | 0 | 14 | 0 | 0  | 14 | 0 | 1  | 13 | 0 | 6 | 7  | 0 | 0 | 7  | 0 | 2 | 5  | 0 | 2 | 3 | 0 |
|             | 9 | 0 | 15 | 0 | 1 | 14 | 0 | 0 | 14 | 0 | 1 | 13 | 0 | 2  | 11 | 0 | 0  | 11 | 0 | 1 | 10 | 0 | 2 | 7  | 1 | 2 | 5  | 0 | 1 | 4 | 0 |
| RSA-MW-6610 | 7 | 0 | 15 | 0 | 0 | 15 | 0 | 1 | 14 | 0 | 0 | 14 | 0 | 1  | 13 | 0 | 0  | 12 | 1 | 0 | 10 | 2 | 3 | 6  | 1 | 1 | 5  | 0 | 0 | 5 | 0 |
|             | 8 | 0 | 15 | 0 | 0 | 15 | 0 | 0 | 15 | 0 | 0 | 15 | 0 | 0  | 15 | 0 | 1  | 13 | 1 | 0 | 12 | 1 | 2 | 10 | 0 | 2 | 7  | 1 | 4 | 3 | 0 |

|             |   |   |    |   |   |    |   |   |    |   |   |    |   |   |    |   |   |    |   |   |    |   |   |    |   |   |    |   |   |   |   |
|-------------|---|---|----|---|---|----|---|---|----|---|---|----|---|---|----|---|---|----|---|---|----|---|---|----|---|---|----|---|---|---|---|
|             | 9 | 0 | 15 | 0 | 0 | 15 | 0 | 0 | 15 | 0 | 1 | 14 | 0 | 1 | 13 | 0 | 0 | 13 | 0 | 3 | 10 | 0 | 0 | 10 | 0 | 1 | 9  | 0 | 4 | 5 | 0 |
| RSA-MW-4243 | 7 | 0 | 15 | 0 | 0 | 15 | 0 | 0 | 15 | 0 | 1 | 14 | 0 | 1 | 13 | 0 | 2 | 11 | 0 | 0 | 11 | 0 | 0 | 11 | 0 | 2 | 9  | 0 | 6 | 3 | 0 |
|             | 8 | 0 | 15 | 0 | 0 | 15 | 0 | 0 | 15 | 0 | 0 | 15 | 0 | 0 | 15 | 0 | 0 | 15 | 0 | 1 | 14 | 0 | 3 | 11 | 0 | 1 | 10 | 0 | 1 | 9 | 0 |
|             | 9 | 0 | 15 | 0 | 1 | 14 | 0 | 0 | 14 | 0 | 0 | 14 | 0 | 0 | 14 | 0 | 1 | 13 | 0 | 2 | 11 | 0 | 2 | 9  | 0 | 3 | 6  | 0 | 3 | 3 | 0 |
| RSA-MW-2399 | 7 | 0 | 15 | 0 | 0 | 15 | 0 | 0 | 15 | 0 | 0 | 15 | 0 | 1 | 14 | 0 | 2 | 12 | 0 | 0 | 12 | 0 | 7 | 5  | 0 | 5 | 0  | 0 | 0 | 0 | 0 |
|             | 8 | 0 | 15 | 0 | 1 | 14 | 0 | 0 | 14 | 0 | 0 | 14 | 0 | 1 | 13 | 0 | 1 | 12 | 0 | 0 | 12 | 0 | 5 | 7  | 0 | 4 | 3  | 0 | 3 | 0 | 0 |
|             | 9 | 0 | 15 | 0 | 0 | 15 | 0 | 0 | 15 | 0 | 0 | 15 | 0 | 0 | 15 | 0 | 1 | 14 | 0 | 3 | 11 | 0 | 2 | 9  | 0 | 2 | 7  | 0 | 4 | 3 | 0 |

**Dead**            **D**  
**Alive**            **A**  
**Censored**        **C**
